# Supplementary material for: Cell-cycle-dependent Colonization of Mouse Spermatogonial Stem Cells After Transplantation into Seminiferous Tubules
Source: PubMed Central journal article supplement — J Reprod Dev. 2013 Nov 21;60(1):37–46. doi: 10.1262/jrd.2013-083 (PMC3958584; doi:10.1262/jrd.2013-083), 2013-11-21
Supplement: jrd-60-037-s001.pdf [file jrd-60-037-s001.pdf]

Supplementary Table S1. Antibodies used in this study

| Antibody                                                              | Company                                                  |
|-----------------------------------------------------------------------|----------------------------------------------------------|
| <b>Primary Antibody</b>                                               |                                                          |
| Biotin-conjugated rat anti-mouse CD9 monoclonal antibody (clone KMC8) | BD Bioscience, Franklin Lakes, NJ                        |
| Rat anti-human CDH1 monoclonal antibody (clone DECMA-1)               | eBioscience, San Diego, CA                               |
| Rabbit anti-CLDN3 antibody                                            | Invitrogen, Carlsbad, CA                                 |
| Rabbit anti-CLDN7 antibody                                            | Gift from Dr. Sachiko Tsukita, Osaka Univ., Suita, Japan |
| Rabbit anti-CLDN8 antibody                                            | Gift from Dr. Sachiko Tsukita, Osaka Univ., Suita, Japan |
| Rat anti-mouse EPCAM monoclonal antibody (clone G8.8)                 | BioLegend, San Diego, CA                                 |
| Goat anti-rat GFRA1 antibody                                          | R&D Systems, Minneapolis, MN                             |
| Rat anti-mouse ITGA6 monoclonal antibody (clone GoH3)                 | IMMUNOTECH, Marseille, France                            |
| Rat anti-mouse active ITGB1 monoclonal antibody (clone 9EG7)          | BD Bioscience, Franklin Lakes, NJ                        |
| Rabbit anti-human Total ITGB1 monoclonal antibody (clone EP1041Y)     | Abcam, Cambridge, MA                                     |
| Rat anti-mouse KIT monoclonal antibody (clone ACK2)                   | e-Bioscience, San Diego, CA                              |
| Mouse anti-active RAC1-GTP monoclonal antibody                        | Neweast Biosciences, Malvern, PA                         |
| Rabbit anti-human RET monoclonal antibody (clone EPR2871)             | EPITOMICS, Burlingame, CA                                |
| Rabbit anti-human ZBTB16 antibody                                     | Santa Cruz Biotechnology, Dallas, TX                     |
| <b>Secondary Antibody</b>                                             |                                                          |
| Alexa Fluor 647-conjugated donkey anti-goat IgG antibody              | Invitrogen, Carlsbad, CA                                 |
| Alexa Fluor 647-conjugated donkey anti-mouse IgG antibody             | Invitrogen, Carlsbad, CA                                 |
| Alexa Fluor 647-conjugated goat anti-rabbit IgG antibody              | Invitrogen, Carlsbad, CA                                 |
| Alexa Fluor 647-conjugated goat anti-rat IgG antibody                 | Invitrogen, Carlsbad, CA                                 |
| Allophycocyanin-conjugated streptavidin                               | eBioscience, San Diego, CA                               |
| DyLight 649-conjugated goat anti-hamster IgG antibody                 | BioLegend, San Diego, CA                                 |

Supplementary Table S2. Primers for Real-Time PCR

| Gene           | Forward sequence         | Reverse Sequence          |
|----------------|--------------------------|---------------------------|
| <i>Ccna1</i>   | ATGCATCGCCAGAGCTCCAAGAG  | GGAAGTGGAGATCTGACTTGAGC   |
| <i>Ccnb1</i>   | GCGTGTGCCTGTGACAGTTA     | CCTAGCGTTTTTGCTTCCCTT     |
| <i>Ccnd2</i>   | TTCATTGAGCACATCCTTCG     | TTCATCATCCTGTGTAAGCC      |
| <i>Ccne1</i>   | ATGTTACAGATGGCGCTTGC     | CCGTGTCGTTGACATAGGC       |
| <i>Cldn3</i>   | ATGTCCATGGGCCTGGAGAT     | TCAGACGTAGTCCTTGCGGT      |
| <i>Gfra1</i>   | GTCAAGGTCTGTCAGCAACTGTCT | TTGCCACTGTTGCTGCAATC      |
| <i>Hprt</i>    | GCTGGTGAAAAGGACCTCT      | CACAGGACTAGAACACCTGC      |
| <i>Itgb1</i>   | ATCGTGCATGTTGTGGAGAC     | CTGCTGTGAGCTTGGTGTTG      |
| <i>Nanos2</i>  | CCATATGCAACTTCTGCAAGC    | TGAGTGTATGAGCCTGGTCG      |
| <i>Nanos3</i>  | CTTCTGTCTACTGCTACACCACC  | TTGGAACCTGCATAGACACC      |
| <i>Neurog3</i> | AGCGGACCACAGCTTCTATG     | AGATGCTTGAGAGCCTCCAC      |
| <i>Ret</i>     | CTGACCATGGGTGACCTCATC    | CAGCCCAAAGTCGGAATCTT      |
| <i>Zbtb16</i>  | GAGACACACAGACAGACCCATACT | CACACATAACACAGGTAGAGGTACG |

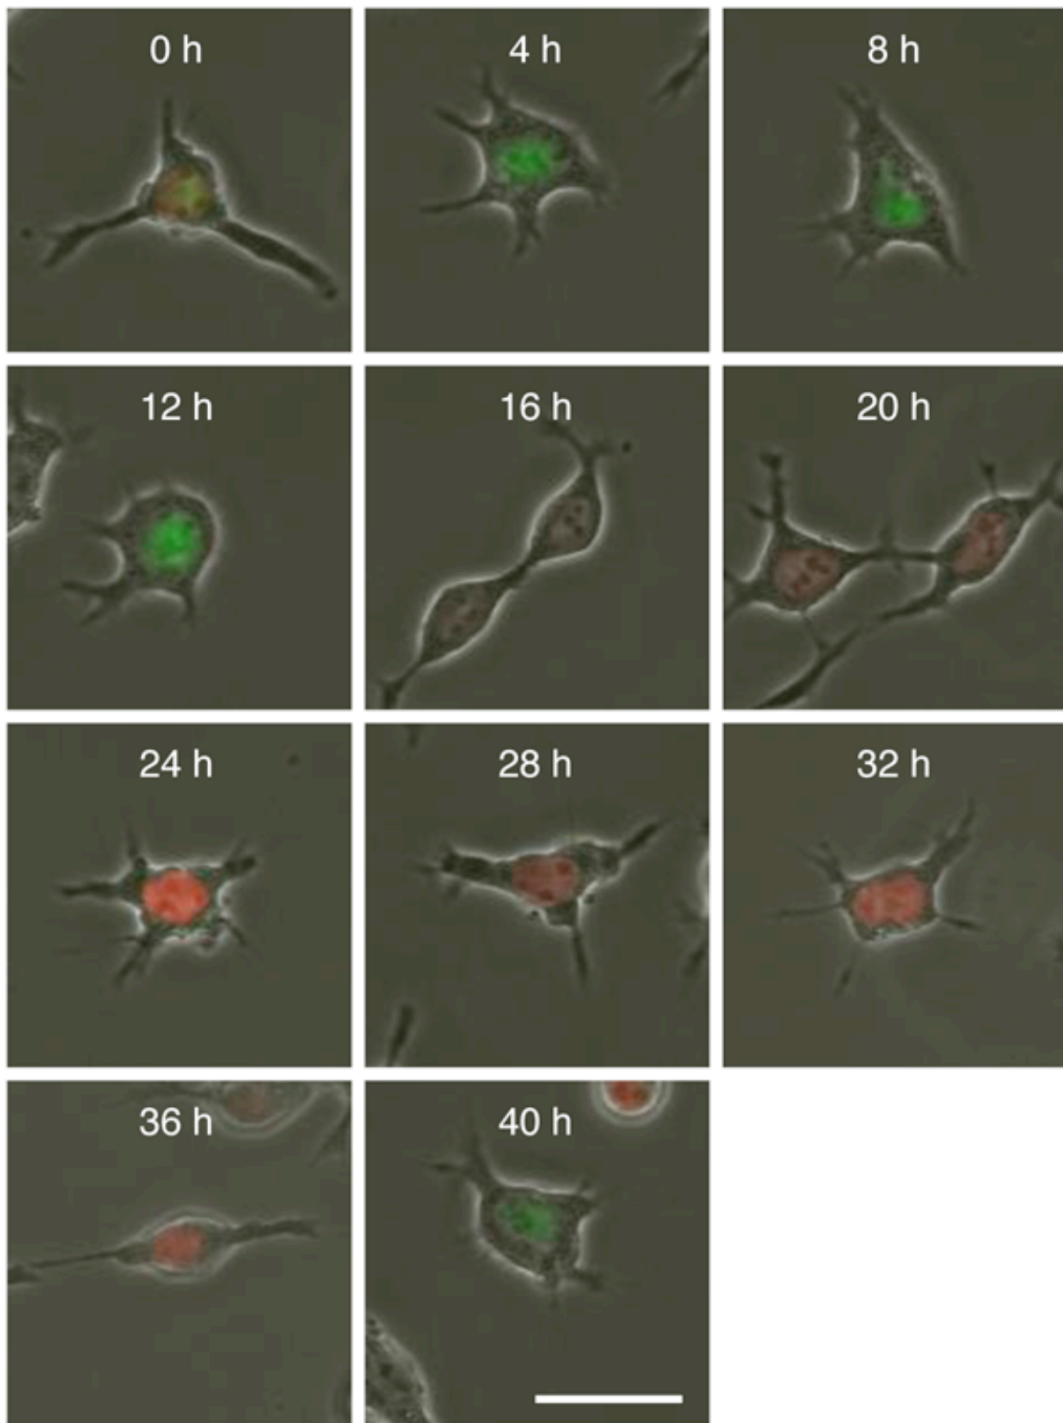

Supplementary Fig. S1 Time lapse analysis of Fucci-ROSA GS cells.

Fucci-ROSA GS cells on laminin-coated plates were analyzed using a computer-assisted fluorescence microscope. Bar = 10  $\mu\text{m}$ .
